# Supplementary material for: A trimetallic strategy towards ZnII4DyIII2CrIII2 and ZnII4DyIII2CoIII2 single-ion magnets
Source: Royal Society of Chemistry journal article supplement (doi:10.1039/c5dt02175h), 2015-01-01
Supplement: c5dt02175h1.pdf [file c5dt02175h1.pdf]

## Supplementary Materials

# Trimetallic strategy towards $\text{Zn}^{\text{II}}_4\text{Dy}^{\text{III}}_2\text{Cr}^{\text{III}}_2$ and $\text{Zn}^{\text{II}}_4\text{Dy}^{\text{III}}_2\text{Co}^{\text{III}}_2$ single-ion magnets

Kong-Qiu Hu,<sup>†</sup> Xiang Jiang,<sup>†</sup> Shu-Qi Wu,<sup>†</sup> Cai-Ming Liu,<sup>‡</sup> Ai-Li Cui,<sup>†</sup> Hui-Zhong Kou<sup>\*†</sup>

<sup>†</sup> Department of Chemistry, Tsinghua University, Beijing 100084, P. R. China. <sup>‡</sup> Beijing

National Laboratory for Molecular Sciences, Center for Molecular Science, Institute of

Chemistry, Chinese Academy of Sciences, Beijing 100190, P. R. China

### Physical measurements

IR spectra were recorded on a Nicolet Magna-IR 750 spectrometer in the 4000-450  $\text{cm}^{-1}$  region. Elemental analyses (C, H, N) were performed on an Elementar Vario MICRO CUBE analyzer. Metallic elemental analyses were carried out on an inductively coupled plasma atomic emission spectrometer. Temperature- and field-dependent magnetic susceptibility measurements were carried out on a Quantum Design SQUID magnetometer. The experimental susceptibilities were corrected for the diamagnetism of the constituent atoms (Pascal's Tables).

Single crystal X-ray data were collected on a Rigaku Saturn724+ CCD diffractometer for complexes **1** and **2**. The structures were solved by direct method (SHELXS-97) and refined by full-matrix least-squares (SHELXL-2014) on  $F^2$ . Anisotropic thermal parameters were used for the non-hydrogen atoms and isotropic parameters for the hydrogen atoms. Hydrogen atoms were added geometrically and refined using a riding model. Because of the weak crystal diffraction of complexes **1** and **2**, some solvents

---

DMF/CH<sub>3</sub>CN/H<sub>2</sub>O molecules experience serious disorder, and cannot be completely found from the difference Fourier map. Therefore the SQUEEZE function of PLATON was applied.

**Synthesis of** {[Zn(Me<sub>2</sub>valpn)]<sub>2</sub>Dy(H<sub>2</sub>O)Co(CN)<sub>6</sub>}<sub>2</sub>·15H<sub>2</sub>O·2DMF·5CH<sub>3</sub>CN (**1**). Zn(Me<sub>2</sub>valpn) (93 mg, 0.2 mmol) and Dy(NO<sub>3</sub>)<sub>3</sub>·6H<sub>2</sub>O (46mg, 0.1 mmol) were mixed in MeCN (10 mL), and K<sub>3</sub>[Co(CN)<sub>6</sub>] (33 mg, 0.1 mmol) in water (5 mL) was then added into the above solution. The resultant solution was stirred for 5 minutes, and was filtered. To the filtrate, DMF (1 mL) was added. The solution was slowly evaporated at room temperature for 2 hrs to afford colorless block single crystals. IR (KBr, cm<sup>-1</sup>): 2127,2162 (C≡N). Anal. Calcd for complex **1** (C<sub>112</sub>H<sub>159</sub>Dy<sub>2</sub>Co<sub>2</sub>N<sub>27</sub>Zn<sub>4</sub>O<sub>35</sub>): C 42.73, H 5.09, N 12.01, Co 3.74, Zn 8.31, Dy 10.32. Measured: C 42.69, H 5.39, N 11.74, Co 3.8, Zn 8.6, Dy 10.1.

**Synthesis of** {[Zn(Me<sub>2</sub>valpn)]<sub>2</sub>Dy(H<sub>2</sub>O)Cr(CN)<sub>6</sub>}<sub>2</sub>·7H<sub>2</sub>O·4DMF (**2**). Zn(Me<sub>2</sub>valpn) (93 mg, 0.2 mmol) and Dy(NO<sub>3</sub>)<sub>3</sub>·6H<sub>2</sub>O (46mg, 0.1 mmol) were mixed in MeCN (10 mL), and K<sub>3</sub>[Cr(CN)<sub>6</sub>] (32 mg, 0.1 mmol) in water (5 mL) was then added into the above solution. The resultant solution was stirred for 5 minutes, and was filtered. To the filtrate, DMF (1 mL) was added. The solution was slowly evaporated at room temperature for 2 hrs to afford buff block single crystals. IR (KBr, cm<sup>-1</sup>): 2108, 2168 (C≡N). Anal. Calcd for complex **2** (C<sub>108</sub>H<sub>140</sub>Dy<sub>2</sub>Cr<sub>2</sub>N<sub>24</sub>Zn<sub>4</sub>O<sub>29</sub>): C 44.29, H 4.82, N 11.48, Cr 3.55, Zn 8.93, Dy 11.10. Measured: C 44.62, H 4.93, N 11.64, Cr 3.6, Zn 8.6, Dy 11.0.

**Table S1.** X-ray crystallographic parameters for complexes **1** and **2**

| complex                                              | <b>1</b>                                                                                                          | <b>2</b>                                                                                                          |
|------------------------------------------------------|-------------------------------------------------------------------------------------------------------------------|-------------------------------------------------------------------------------------------------------------------|
| formula                                              | C <sub>112</sub> H <sub>159</sub> Dy <sub>2</sub> Co <sub>2</sub> N <sub>27</sub> Zn <sub>4</sub> O <sub>35</sub> | C <sub>108</sub> H <sub>140</sub> Dy <sub>2</sub> Cr <sub>2</sub> N <sub>24</sub> Zn <sub>4</sub> O <sub>29</sub> |
| Fw                                                   | 3148.00                                                                                                           | 2928.92                                                                                                           |
| T/K                                                  | 163                                                                                                               | 163                                                                                                               |
| crystal system                                       | Monoclinic                                                                                                        | Monoclinic                                                                                                        |
| space group                                          | <i>P2(1)/c</i>                                                                                                    | <i>P2(1)/c</i>                                                                                                    |
| <i>a</i> /Å                                          | 20.089(3)                                                                                                         | 16.929(3)                                                                                                         |
| <i>b</i> /Å                                          | 15.835(2)                                                                                                         | 22.842(5)                                                                                                         |
| <i>c</i> /Å                                          | 28.012(3)                                                                                                         | 20.172(4)                                                                                                         |
| $\beta$ /°                                           | 128.896(7)                                                                                                        | 105.86(3)                                                                                                         |
| <i>V</i> /Å <sup>3</sup>                             | 6935(2)                                                                                                           | 7503(3)                                                                                                           |
| <i>Z</i>                                             | 2                                                                                                                 | 2                                                                                                                 |
| $\rho_{\text{calcd}}$ /g cm <sup>-3</sup>            | 1.507                                                                                                             | 1.296                                                                                                             |
| $\mu(\text{MoKa})$ /mm <sup>-1</sup>                 | 2.057                                                                                                             | 1.816                                                                                                             |
| F(000)                                               | 3212                                                                                                              | 2976                                                                                                              |
| Ref [ <i>I</i> > 2 $\sigma$ ]                        | 12951                                                                                                             | 8868                                                                                                              |
| GOF                                                  | <b>1.065</b>                                                                                                      | 0.980                                                                                                             |
| R1[ <i>I</i> > 2 $\sigma$ ( <i>I</i> )] <sup>a</sup> | <b>0.0479</b>                                                                                                     | 0.1000                                                                                                            |
| wR2 (all data) <sup>b</sup>                          | <b>0.1403</b>                                                                                                     | 0.2924                                                                                                            |

<sup>a</sup>  $R1 = \frac{\sum \left( |F_o| - |F_c| \right)}{\sum |F_o|}$ , <sup>b</sup>  $wR2 = \left\{ \frac{\sum \left[ w \left( F_o^2 - F_c^2 \right)^2 \right]}{\sum \left[ w \left( F_o^2 \right)^2 \right]} \right\}^{1/2}$

Table S2 Selected bond distances (Å) and bond angles (°) for complex 1

|                      |           |                      |            |
|----------------------|-----------|----------------------|------------|
| Dy(1)–O(6)           | 2.323(3)  | Zn(2)–O(6)           | 2.071(3)   |
| Dy(1)–O(1W)          | 2.316(3)  | Zn(1)–N(6)           | 2.018(4)   |
| Dy(1)–O(2)           | 2.334(3)  | Zn(1)–O(1)           | 2.028(3)   |
| Dy(1)–O(5)           | 2.376(3)  | Zn(1)–N(4)           | 2.042(4)   |
| Dy(1)–O(1)           | 2.393(3)  | Zn(1)–N(3)           | 2.074(4)   |
| Dy(1)–O(7)           | 2.478(3)  | Zn(1)–O(2)           | 2.087(3)   |
| Dy(1)–O(3)           | 2.485(3)  | Co(1A)–C(6)          | 1.789(5)   |
| Dy(1)–O(4)           | 2.535(3)  | Co(1A)–C(10A)        | 1.905(10)  |
| Dy(1)–O(8)           | 2.554(3)  | Co(1A)–C(9)          | 1.812(5)   |
| Zn(2)–N(9)           | 2.006(4)  | Co(1A)–C(11A)        | 1.932(11)  |
| Zn(2)–N(2)           | 2.050(4)  | Co(1A)–C(8B)         | 1.946(12)  |
| Zn(2)–N(1)           | 2.067(4)  | Co(1A)–C(7A)         | 1.903(10)  |
| Zn(2)–O(5)           | 2.058(3)  | Co(1B)–C(6)          | 1.999(6)   |
| Co(1B)–C8A)          | 1.877(14) | Co(1B)–C(9)          | 1.974(6)   |
| Co(1B)–C(11B)        | 1.878(14) | Co(1B)–C(10B)        | 1.881(13)  |
| Co(1B)–C7B)          | 1.941(16) |                      |            |
| Co(1A)–C(6)–N(6)     | 173.3(5)  | N(6)–C(6)–Co(1B)     | 170.5(5)   |
| Co(1A)–C(9)–N(9)     | 171.8(5)  | N(10B)–C(10B)–Co(1B) | 179.2(16)  |
| Co(1A)–C(8B)–N(8B)   | 178.0(10) | N(8A)–C(8A)–Co(1B)   | 176.9(15)  |
| Co(1A)–C(7A)–N(7A)   | 178(3)    | N(7B)–C(7B)–Co(1B)   | 175(4)     |
| Co(1A)–C(10A)–N(10A) | 176.1(10) | Zn(2)–O(5)–Dy(1)     | 107.46(11) |
| Co(1A)–C(11A)–N(11A) | 178.6(12) | Zn(1)–O(2)–Dy(1)     | 108.05(12) |
| N(11B)–C(11B)–Co(1B) | 177.3(18) | Zn(2)–O(6)–Dy(1)     | 108.97(12) |
| N(9)–C(9)–Co(1B)     | 171.8(5)  | Zn(1)–O(1)–Dy(1)     | 107.91(12) |
| C(6)–N(6)–Zn(1)      | 155.8(4)  | C(9)–N(9)–Zn(2)#1    | 160.2(4)   |

#1: 1-x, 2-y, 2-z

Table S3 Selected bond distances (Å) and bond angles (°) for complex 2

|                 |           |                  |           |
|-----------------|-----------|------------------|-----------|
| Dy(1)–O(5)      | 2.356(6)  | Zn(2)–N(7)       | 2.133(11) |
| Dy(1)–O(1)      | 2.364(7)  | Zn(1)–O(6)       | 2.039(6)  |
| Dy(1)–O(1W)     | 2.416(7)  | Zn(1)–N(9)       | 2.066(9)  |
| Dy(1)–O(2)      | 2.433(7)  | Zn(1)–N(10)      | 2.066(9)  |
| Dy(1)–O(6)      | 2.467(6)  | Zn(1)–N(1)       | 2.073(8)  |
| Dy(1)–O(8)      | 2.526(6)  | Zn(1)–O(5)       | 2.122(6)  |
| Dy(1)–O(4)      | 2.536(6)  | Cr(1)–C(4)       | 2.071(7)  |
| Dy(1)–O(7)      | 2.571(6)  | Cr(1)–C(1)       | 2.086(10) |
| Dy(1)–O(3)      | 2.595(6)  | Cr(1)–C(5)       | 2.095(9)  |
| Zn(2)–N(8)      | 2.054(10) | Cr(1)–C(6)       | 2.096(10) |
| Zn(2)–N(3)      | 2.069(9)  | Cr(1)–C(3)       | 2.111(10) |
| Zn(2)–O(2)      | 2.084(7)  | Cr(1)–C(2)       | 2.131(11) |
| Zn(2)–O(1)      | 2.095(8)  |                  |           |
| Cr(1)–C(1)–N(1) | 172.9(10) | Cr(1)–C(6)–N(6)  | 175.5(12) |
| Cr(1)–C(2)–N(2) | 172.9(8)  | Zn(2)–O(1)–Dy(1) | 109.1(3)  |
| Cr(1)–C(3)–N(3) | 172.6(9)  | Zn(2)–O(2)–Dy(1) | 107.0(3)  |
| Cr(1)–C(4)–N(4) | 169.0(13) | Zn(1)–O(5)–Dy(1) | 108.5(2)  |
| Cr(1)–C(5)–N(5) | 177.0(10) | Zn(1)–O(6)–Dy(1) | 107.3(2)  |

Table S4. Continuous Shape Measures calculation for the Dy(III) ions in complexes **1-2**

Nine-coordination

Complex **1**, Dy structures

| Structure [ML9] | EP-9   | OPY-9  | HBPY-9 | JTC-9  | JCCU-9 | CCU-9 | JCSAP R-9 | <b>CSAPR-9</b> | JTCTP R-9 | TCTPR -9 | JTDIC -9 | HH-9  | <b>MFF-9</b> |
|-----------------|--------|--------|--------|--------|--------|-------|-----------|----------------|-----------|----------|----------|-------|--------------|
| ABOXY           | 34.512 | 21.991 | 17.249 | 14.843 | 8.405  | 7.387 | 3.826     | <b>2.483</b>   | 5.402     | 2.572    | 10.197   | 7.195 | <b>2.266</b> |

Nine-coordination

Complex **2**, Dy structures

| Structure [ML9] | EP-9   | OPY-9  | HBPY-9 | JTC-9  | JCCU-9 | CCU-9 | JCSAP R-9 | <b>CSAPR-9</b> | JTCTP R-9 | TCTPR -9 | JTDIC-9 | HH-9  | <b>MFF-9</b> |
|-----------------|--------|--------|--------|--------|--------|-------|-----------|----------------|-----------|----------|---------|-------|--------------|
| ABOXY           | 34.297 | 21.691 | 17.461 | 14.330 | 8.812  | 7.656 | 3.577     | <b>2.218</b>   | 5.072     | 2.403    | 9.592   | 7.642 | <b>2.105</b> |

|                |           |            |                                          |
|----------------|-----------|------------|------------------------------------------|
| EP-9           | 1         | D9h        | Enneagon                                 |
| OPY-9          | 2         | C8v        | Octagonal pyramid                        |
| HBPY-9         | 3         | D7h        | Heptagonal bipyramid                     |
| JTC-9          | 4         | C3v        | Johnson triangular cupola J3             |
| JCCU-9         | 5         | C4v        | Capped cube J8                           |
| CCU-9          | 6         | C4v        | Spherical-relaxed capped cube            |
| JCSAPR-9       | 7         | C4v        | Capped square antiprism J10              |
| <b>CSAPR-9</b> | <b>8</b>  | <b>C4v</b> | <b>Spherical capped square antiprism</b> |
| JTCTPR-9       | 9         | D3h        | Tricapped trigonal prism J51             |
| TCTPR-9        | 10        | D3h        | Spherical tricapped trigonal prism       |
| JTDIC-9        | 11        | C3v        | Tridiminished icosahedron J63            |
| HH-9           | 12        | C2v        | Hula-hoop                                |
| <b>MFF-9</b>   | <b>13</b> | <b>Cs</b>  | <b>Muffin</b>                            |

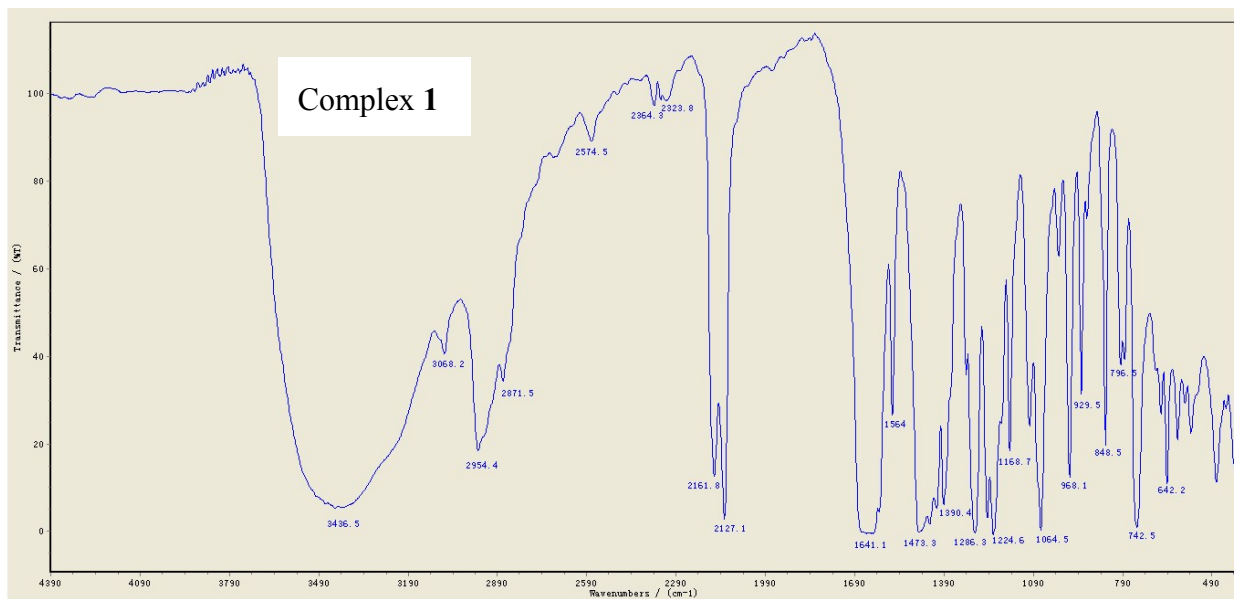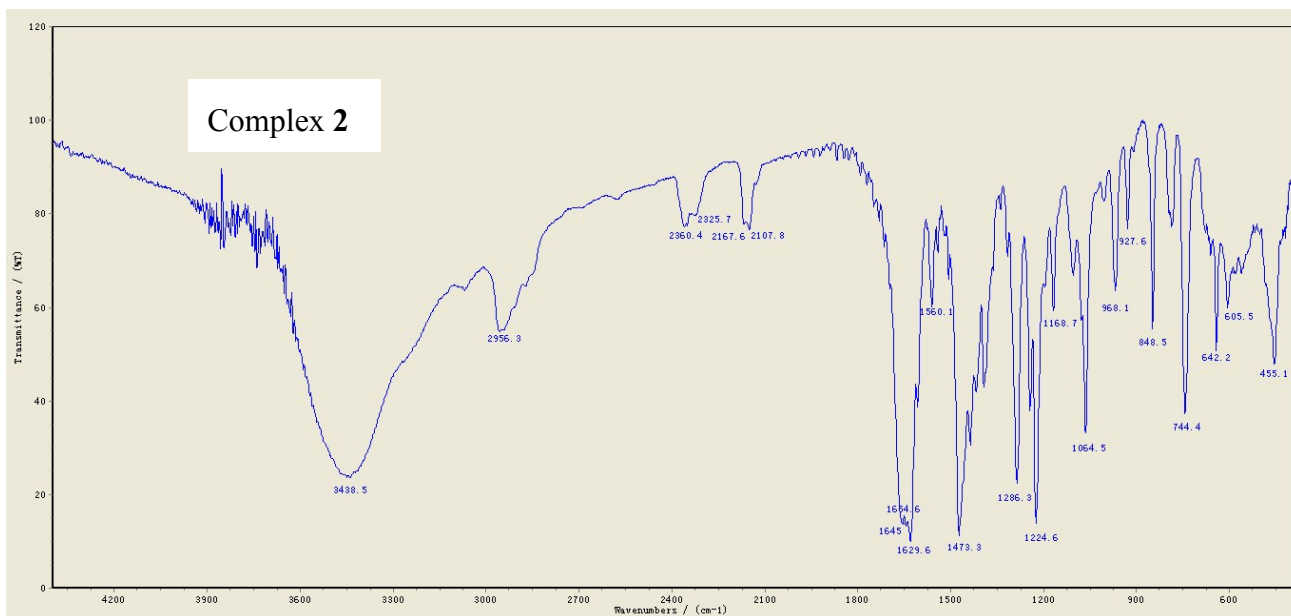

Fig. S1. IR spectra of complexes 1-2.

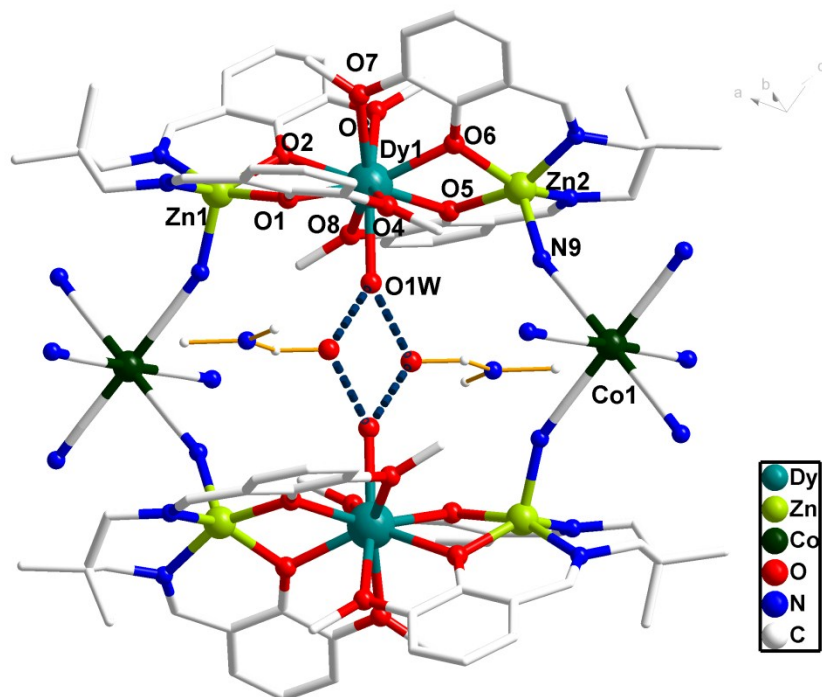

Fig. S2. The hydrogen bonding in complex 1.

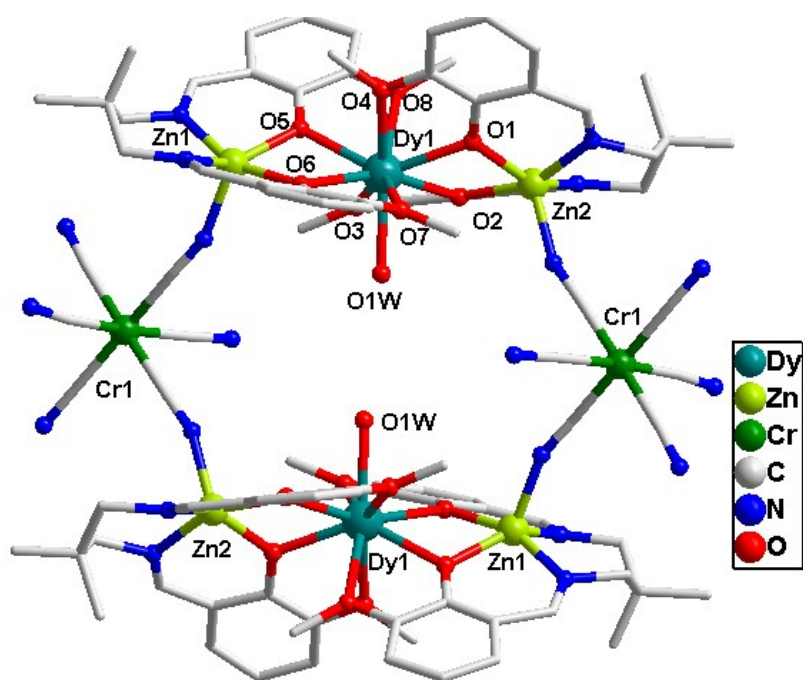

Fig. S3. The octanuclear cyclic structure of complex 2.



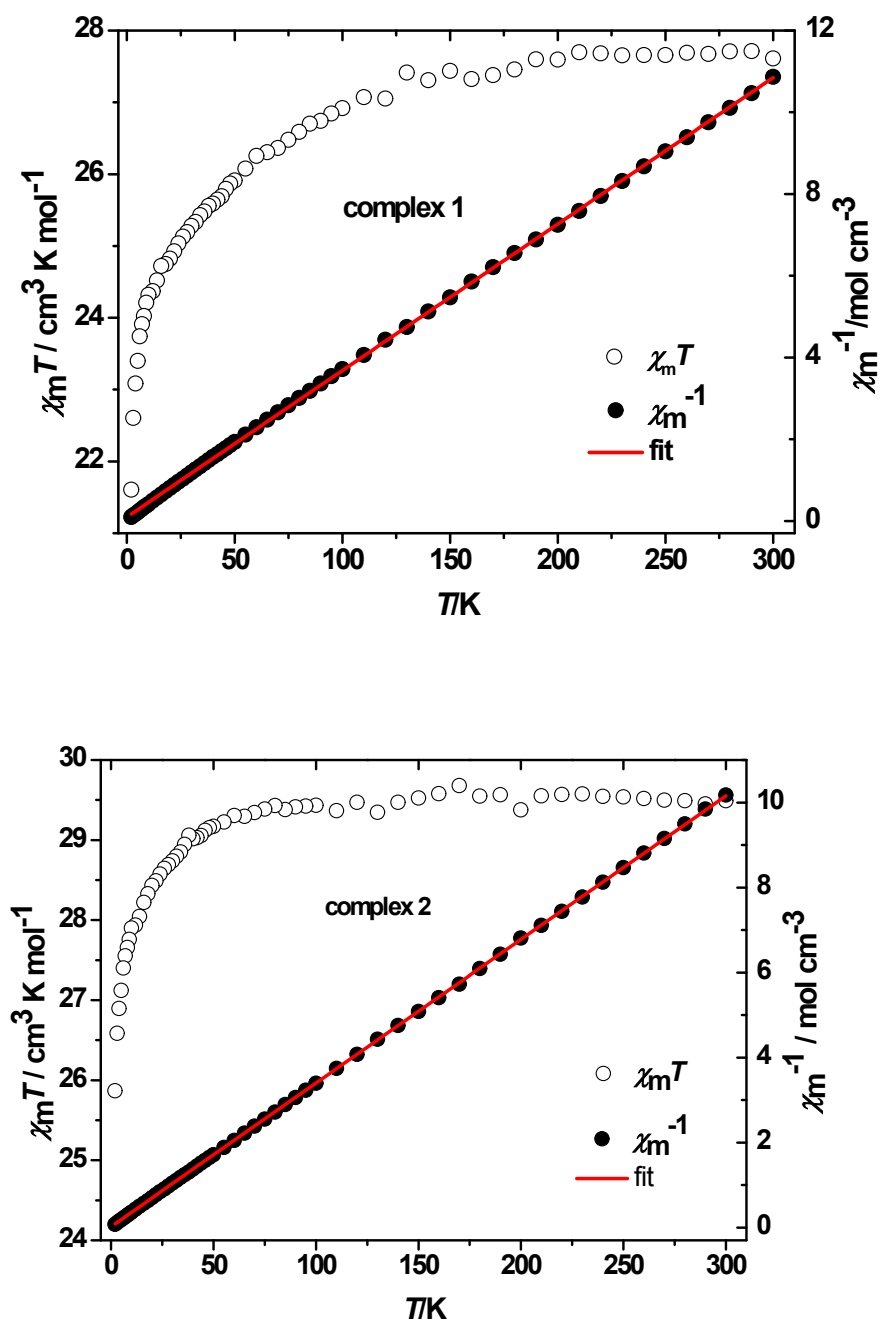

Fig. S4. Temperature dependence of  $\chi_m T$  for complexes 1-2.

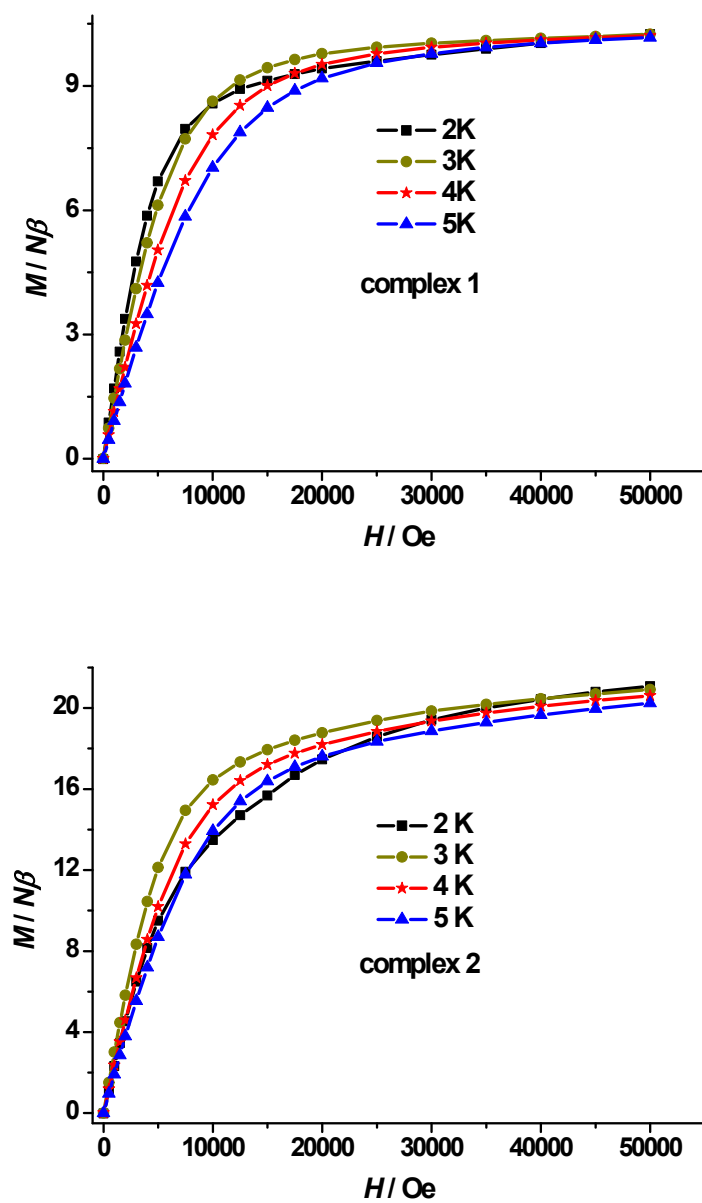

Fig. S5. Temperature dependence of the magnetic susceptibilities at 2-5 K for complexes 1-2.

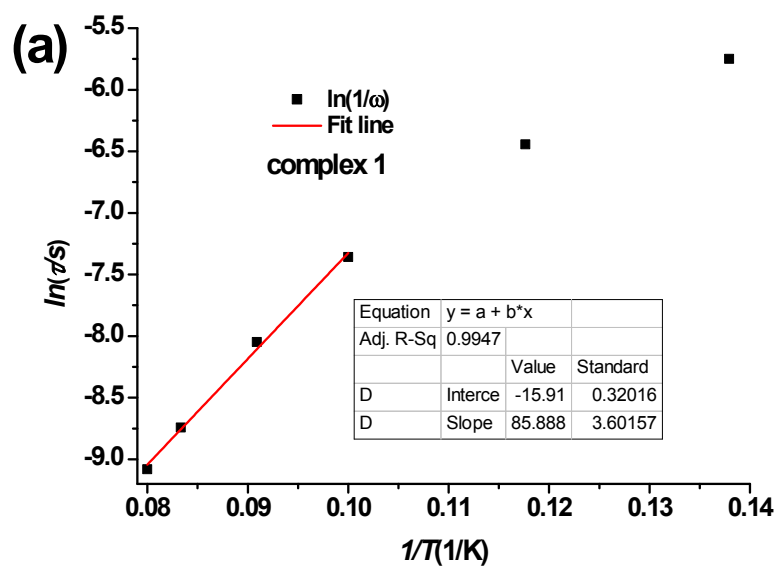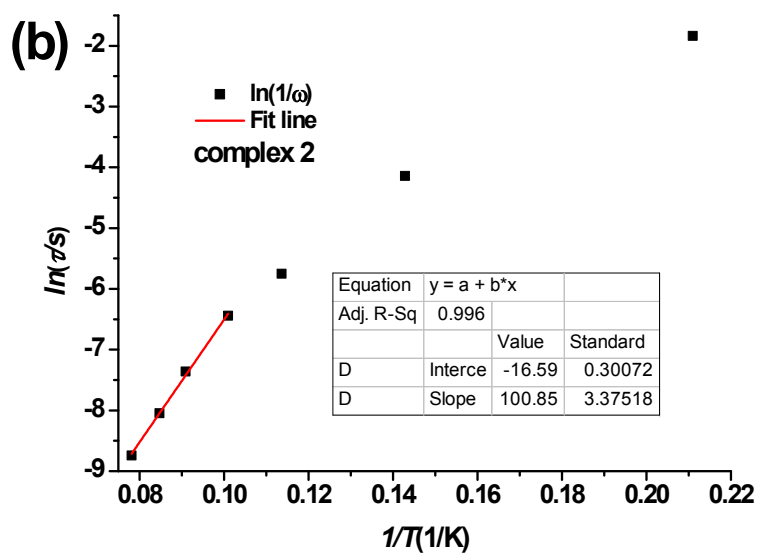

**Fig. S6.** The  $\ln(\tau)$  vs.  $T^{-1}$  plots based on the Arrhenius relationship for complexes **1** (a) and **2** (b).

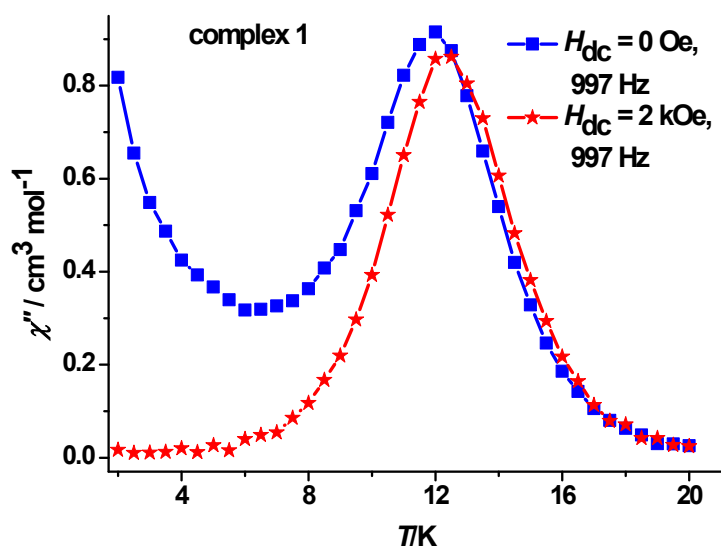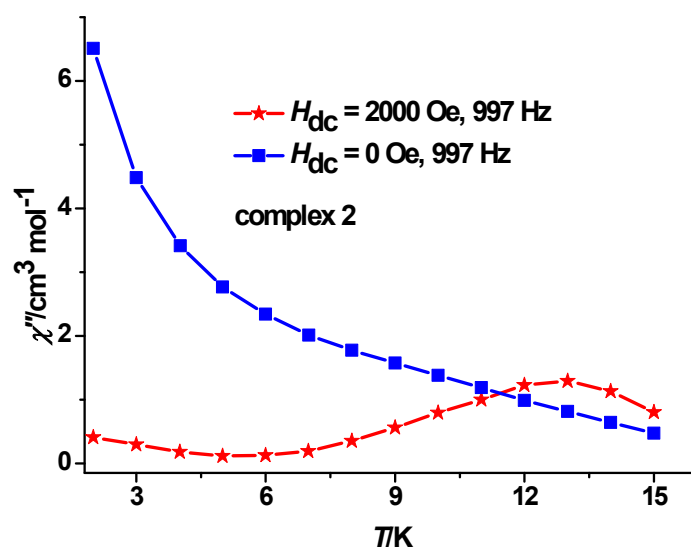

**Fig. S7.** The out-of-phase ( $\chi_m''$ ) ac magnetic susceptibilities for complexes **1-2** in 997 Hz under zero and 2 kOe dc field.

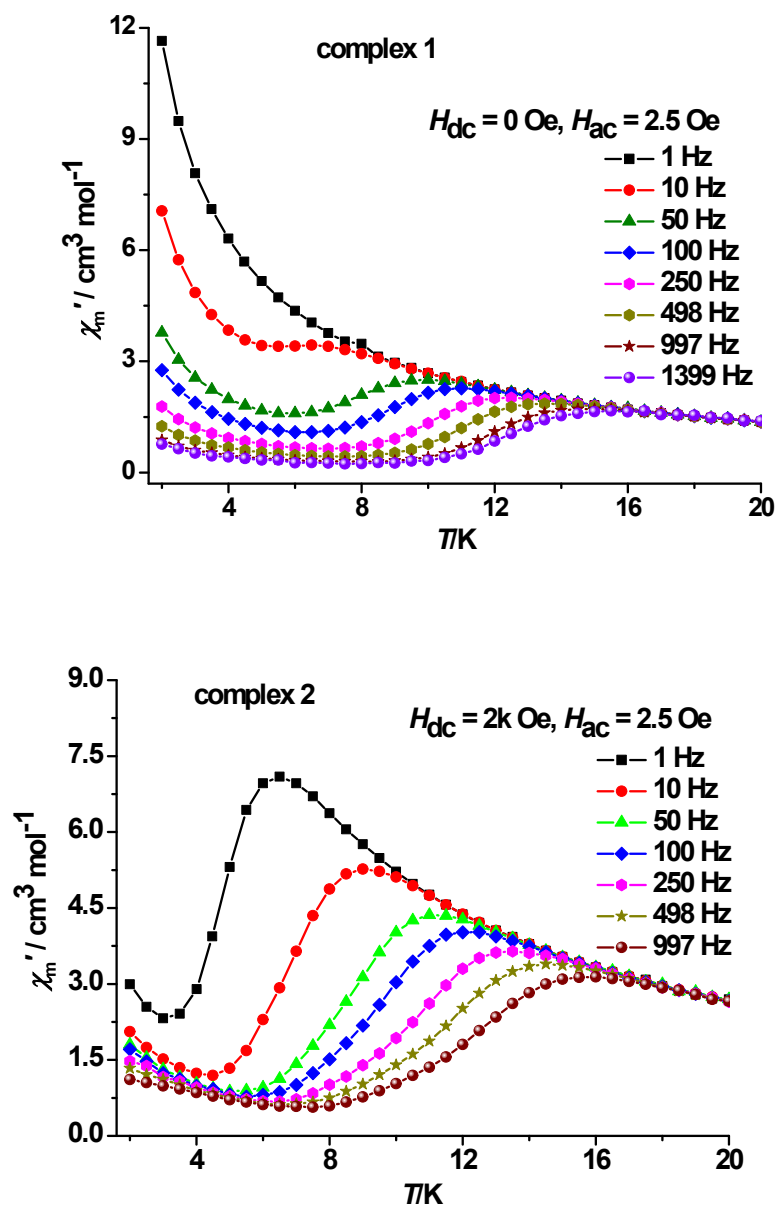

**Fig. S8.** The in-phase ( $\chi_m'$ ) ac magnetic susceptibilities for complexes 1-2 under zero and 2 kOe dc field.

**Fit of Cole-Cole plots.** The derivation of Debye model mentioned in the text is applied and displayed here:

$$\chi'_M = \chi_1 + (\chi_T - \chi_S) \left( \frac{\beta(1 + (\omega\tau_1)^{1-\alpha_1}) \sin\left(\frac{\pi}{2}\alpha_1\right)}{1 + 2(\omega\tau_1)^{1-\alpha_1} \sin\left(\frac{\pi}{2}\alpha_1\right) + (\omega\tau_1)^{2(1-\alpha_1)}} + \frac{(1-\beta)(1 + (\omega\tau_2)^{1-\alpha_2}) \sin\left(\frac{\pi}{2}\alpha_2\right)}{1 + 2(\omega\tau_2)^{1-\alpha_2} \sin\left(\frac{\pi}{2}\alpha_2\right) + (\omega\tau_2)^{2(1-\alpha_2)}} \right)$$

$$\chi''_M = (\chi_T - \chi_S) \left( \frac{\beta((\omega\tau_1)^{1-\alpha_1}) \cos\left(\frac{\pi}{2}\alpha_1\right)}{1 + 2(\omega\tau_1)^{1-\alpha_1} \sin\left(\frac{\pi}{2}\alpha_1\right) + (\omega\tau_1)^{2(1-\alpha_1)}} + \frac{(1-\beta)((\omega\tau_2)^{1-\alpha_2}) \cos\left(\frac{\pi}{2}\alpha_2\right)}{1 + 2(\omega\tau_2)^{1-\alpha_2} \sin\left(\frac{\pi}{2}\alpha_2\right) + (\omega\tau_2)^{2(1-\alpha_2)}} \right)$$

**Table S5.** Parameters in double magnetic relaxations for complex **1**

| $T / \text{K}$ | $\alpha$              |                        | $\tau$               |                       | $\chi$   |                       | $\beta$ |
|----------------|-----------------------|------------------------|----------------------|-----------------------|----------|-----------------------|---------|
|                | $\alpha_1$            | $\alpha_2$             | $\tau_1$             | $\tau_2$              | $\chi_T$ | $\chi_S$              |         |
| 2              | 0.14                  | 0.42                   | 0.187                | 0.028                 | 12.59    | 0.16                  | 0.38    |
| 4              | 0.41                  | 0.11                   | 0.0249               | 0.164                 | 6.706    | 0.11                  | 0.58    |
| 6              | 0.31                  | 0.028                  | 0.0121               | 0.0672                | 4.44     | 0.41                  | 0.13    |
| 7              | 0.029                 | 0.258                  | 0.037                | $7.4 \times 10^{-3}$  | 3.81     | 0.12                  | 0.61    |
| 8              | 0.21                  | 0.024                  | $4.8 \times 10^{-3}$ | 0.021                 | 3.34     | 0.12                  | 0.35    |
| 9              | 0.17                  | 0.018                  | $3.3 \times 10^{-3}$ | 0.011                 | 2.98     | 0.10                  | 0.37    |
| 10             | $4.6 \times 10^{-3}$  | 0.103                  | $6.5 \times 10^{-3}$ | $2.3 \times 10^{-3}$  | 2.69     | 0.11                  | 0.55    |
| 11             | $1.5 \times 10^{-14}$ | 0.079                  | $3.6 \times 10^{-3}$ | $1.4 \times 10^{-3}$  | 2.45     | 0.11                  | 0.43    |
| 12             | 0.046                 | $2.69 \times 10^{-14}$ | 0.046                | $2.7 \times 10^{-14}$ | 2.25     | $2.8 \times 10^{-18}$ | 0.72    |

**Table S6.** Parameters in double magnetic relaxations for complex **2**

| $T / \text{K}$ | $\alpha$   |                       | $\tau$               |                      | $\chi$   |                       | $\beta$ |
|----------------|------------|-----------------------|----------------------|----------------------|----------|-----------------------|---------|
|                | $\alpha_1$ | $\alpha_2$            | $\tau_1$             | $\tau_2$             | $\chi_T$ | $\chi_S$              |         |
| 2              | 0.24       | 0.42                  | 0.00142              | 72.29                | 26.05    | 0.6341                | 0.0438  |
| 4              | 0.38       | 0.21                  | $1.2 \times 10^{-4}$ | 3.61                 | 11.93    | $1.4 \times 10^{-15}$ | 0.0845  |
| 6              | 0.21       | 0.31                  | 0.328                | $3.4 \times 10^{-5}$ | 8.71     | $3.6 \times 10^{-13}$ | 0.93    |
| 8              | 0.32       | 0.09                  | 0.0129               | 0.0642               | 6.51     | 0.39                  | 0.34    |
| 10             | 0.373      | $1.2 \times 10^{-13}$ | 0.0038               | 0.014                | 5.35     | 0.24                  | 0.59    |
| 12             | 0.064      | 0.13                  | 0.0034               | $7.7 \times 10^{-4}$ | 4.39     | 0.63                  | 0.59    |

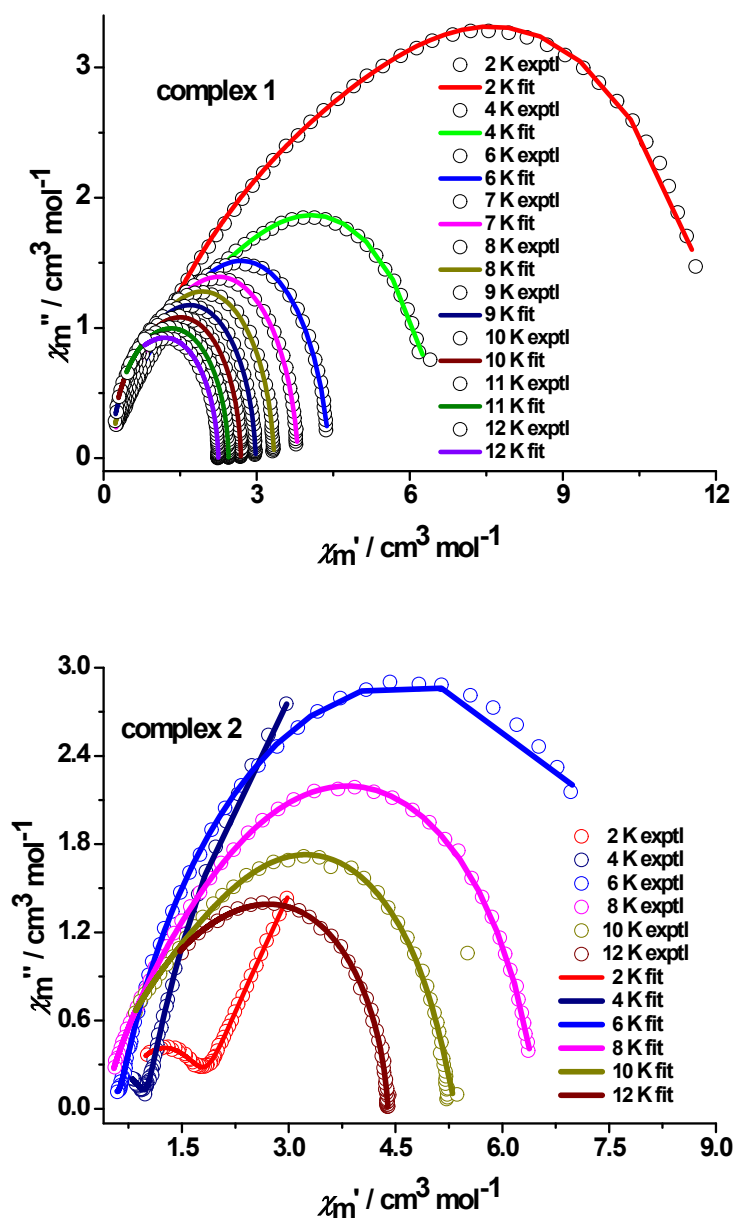

**Fig. S9.** Cole-Cole plots of complexes **1** ( $H_{\text{dc}} = 0$  Oe and  $H_{\text{ac}} = 2.5$  Oe) and **2** ( $H_{\text{dc}} = 2$  kOe and  $H_{\text{ac}} = 2.5$  Oe). The solid lines represent the best fit results.

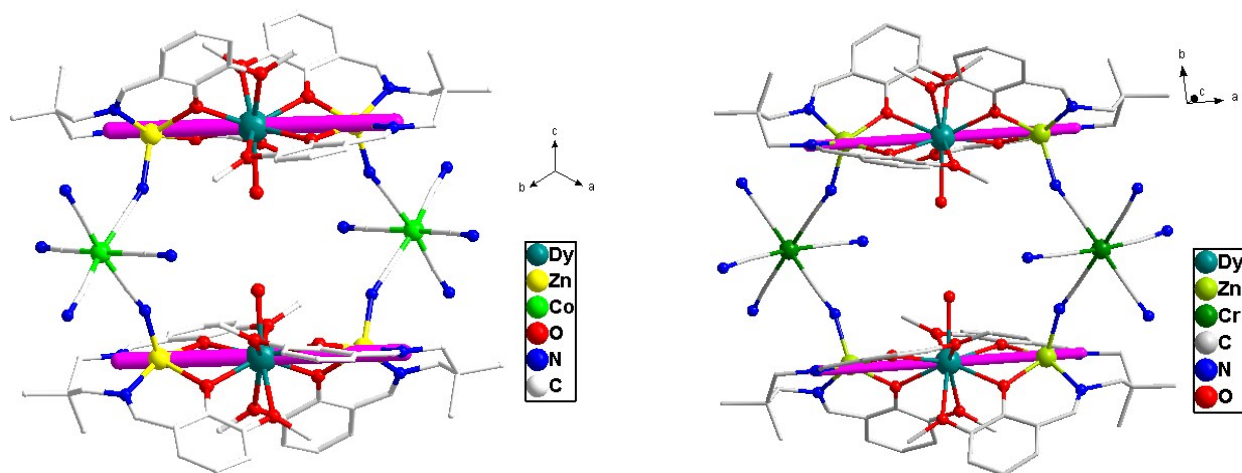

**Fig. S10.** Direction of the anisotropic axis of Dy(III) ions in complexes **1** (Left) and **2** (Right).



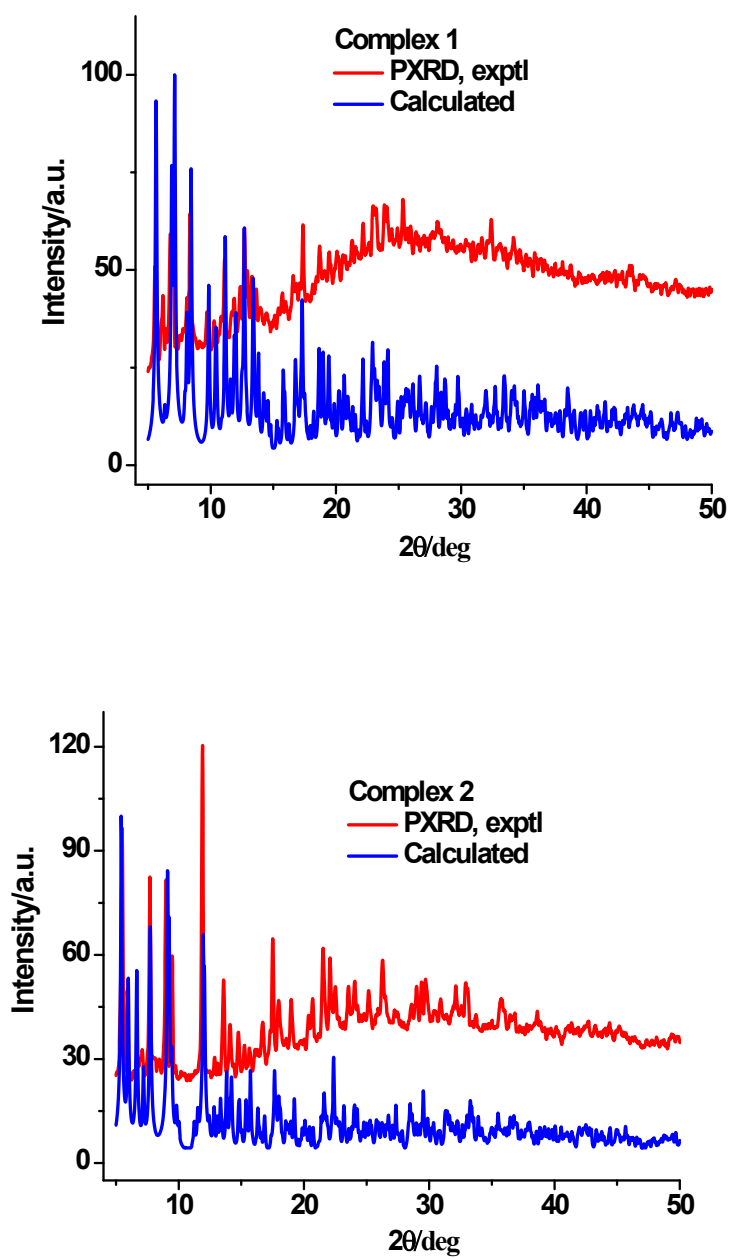

**Fig. S11.** Powder XRD patterns of complexes 1 and 2.
